# Supplementary material for: Effects of the Use of Assisted Reproductive Technologies and an Obesogenic Environment on Resistance Artery Function and Diabetes Biomarkers in Mice Offspring
Source: PubMed Central journal article supplement (PMC4227714; doi:10.1371/journal.pone.0112651), 2014-11-11
Supplement: pone.0112651.s001.pdf [file pone.0112651.s001.pdf]

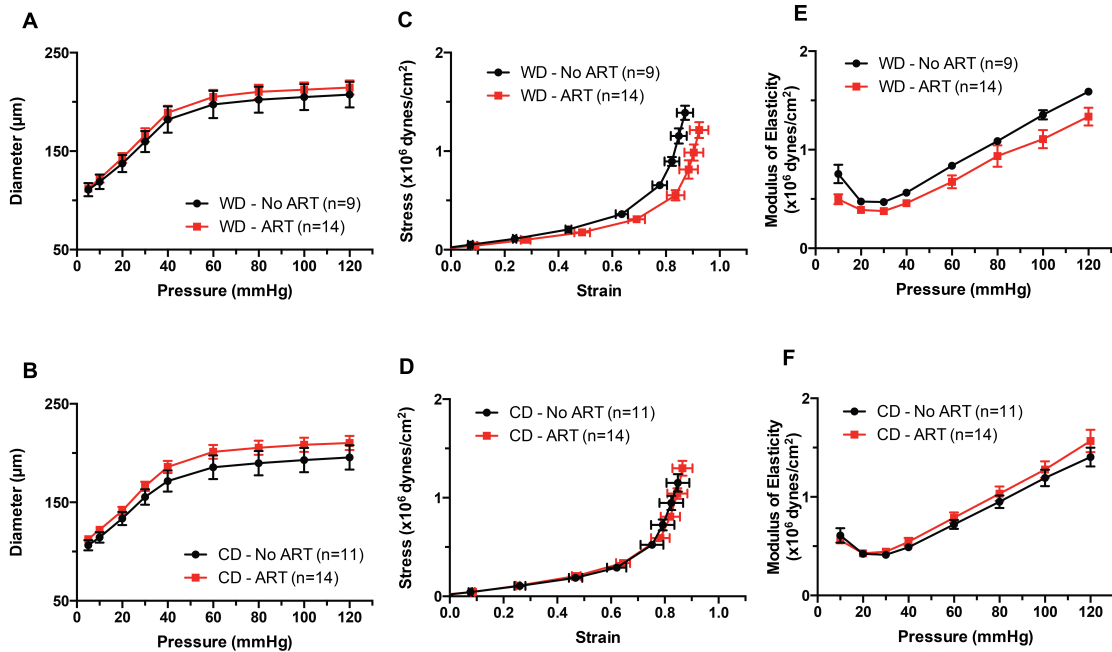

**Figure S1. Effect of diet and ART on the passive diameter and elastic properties of mesenteric resistance arteries from juvenile mice.** (A,B) Maximal passive diameters under calcium-free conditions at different intravascular pressures in isolated resistance arteries. (C,D) Strain-stress relationships of isolated mesenteric resistance arteries under passive conditions. (E,F) Moduli of elasticity of isolated mesenteric resistance vessels at different intravascular pressures under passive conditions. Data are means  $\pm$  SEM.
