# Supplementary material for: Effects of the Use of Assisted Reproductive Technologies and an Obesogenic Environment on Resistance Artery Function and Diabetes Biomarkers in Mice Offspring
Source: PubMed Central journal article supplement (PMC4227714; doi:10.1371/journal.pone.0112651), 2014-11-11
Supplement: pone.0112651.s002.pdf [file pone.0112651.s002.pdf]

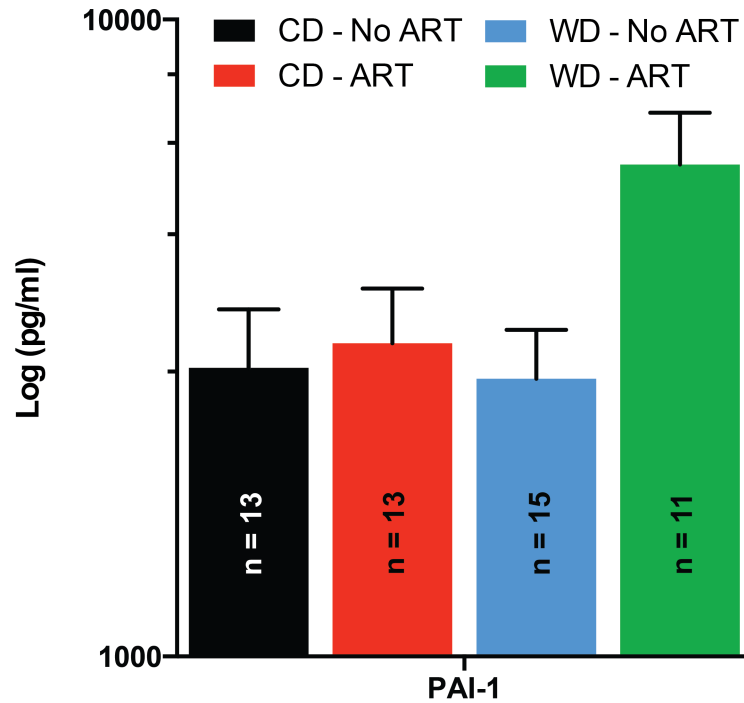

**Figure S2. Effect of diet and ART on serum PAI-1 concentrations in juvenile mice.** Serum PAI-1 concentrations were numerically greater ( $P=0.06$ ) in WD-ART than in in WD-No ART mice. Data are means  $\pm$  SEM.
