# Supplementary material for: Effects of the Use of Assisted Reproductive Technologies and an Obesogenic Environment on Resistance Artery Function and Diabetes Biomarkers in Mice Offspring
Source: PubMed Central journal article supplement (PMC4227714; doi:10.1371/journal.pone.0112651), 2014-11-11
Supplement: pone.0112651.s003.pdf [file pone.0112651.s003.pdf]

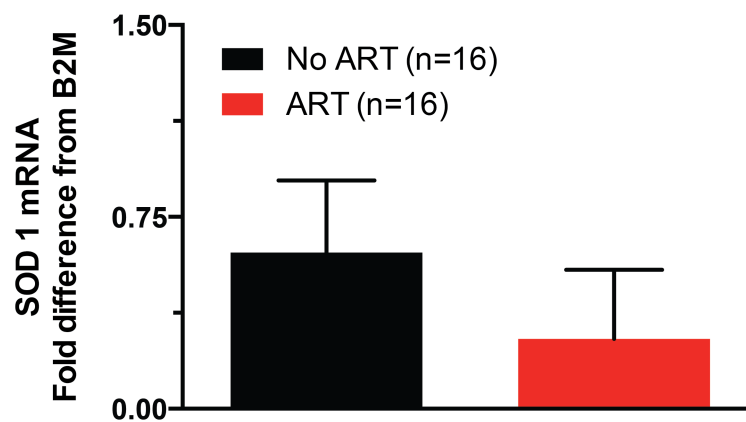

**Figure S3. Effect of ART on expression of SOD-1 in juvenile mice.** Quantitative RT-PCR assessment of expression of the SOD-1 gene in mice blood vessels. Gene expression was normalized to the expression of B2m (DCT) and then averaged within the respective groups and expressed as fold difference. Data are means  $\pm$  SEM. qRT-PCR procedures were as described in Schenewerk et al., and TaqMan probes for SOD1 and B2m were purchased from Applied Biosystems (Assay ID- Mm01344233\_g1 and Mm00430072\_m1, respectively).
