# Supplementary material for: Effects of the Use of Assisted Reproductive Technologies and an Obesogenic Environment on Resistance Artery Function and Diabetes Biomarkers in Mice Offspring
Source: PubMed Central journal article supplement (PMC4227714; doi:10.1371/journal.pone.0112651), 2014-11-11
Supplement: pone.0112651.s004.pdf [file pone.0112651.s004.pdf]

**Table S1: Offspring Distribution Per Dam**

**Vascular experiments**

| No ART CD   |                  |             |                  | No ART WD   |                  |             |                  | ART CD      |                  |             |                  | ART WD      |                  |             |                  |
|-------------|------------------|-------------|------------------|-------------|------------------|-------------|------------------|-------------|------------------|-------------|------------------|-------------|------------------|-------------|------------------|
| Dam         | Male offspring   | Dam         | Female offspring | Dam         | Male offspring   | Dam         | Female offspring | Dam         | Male offspring   | Dam         | Female offspring | Dam         | Male offspring   | Dam         | Female offspring |
| D1          | 2                | D1          | 1                | D1          | 1                | D1          | 2                | D1          | 3                | D1          | 1                | D1          | 4                | D1          | 2                |
| D2          | 1                | D2          | 1                | D2          | 2                | D2          | 1                | D2          | 1                | D2          | 3                | D2          | 4                | D2          | 3                |
| D3          | 1                | D3          | 2                | D3          | 1                | D3          | 1                | D3          | 1                | D3          | 2                | D3          | 1                |             |                  |
| D4          | 2                | D4          | 2                | D4          | 2                | D4          | 2                | D4          | 2                | D4          | 1                |             |                  |             |                  |
|             |                  |             |                  |             |                  |             |                  | D5          | 1                |             |                  |             |                  |             |                  |
| <b>Dams</b> | <b>Offspring</b> | <b>Dams</b> | <b>Offspring</b> | <b>Dams</b> | <b>Offspring</b> | <b>Dams</b> | <b>Offspring</b> | <b>Dams</b> | <b>Offspring</b> | <b>Dams</b> | <b>Offspring</b> | <b>Dams</b> | <b>Offspring</b> | <b>Dams</b> | <b>Offspring</b> |
| <b>4</b>    | <b>6</b>         | <b>4</b>    | <b>6</b>         | <b>4</b>    | <b>6</b>         | <b>4</b>    | <b>6</b>         | <b>5</b>    | <b>8</b>         | <b>4</b>    | <b>7</b>         | <b>3</b>    | <b>9</b>         | <b>2</b>    | <b>5</b>         |

**Bio-Plex experiments**

| No ART CD   |                  |             |                  | No ART WD   |                  |             |                  | ART CD      |                  |             |                  | ART WD      |                  |             |                  |
|-------------|------------------|-------------|------------------|-------------|------------------|-------------|------------------|-------------|------------------|-------------|------------------|-------------|------------------|-------------|------------------|
| Dam         | Male offspring   | Dam         | Female offspring | Dam         | Male offspring   | Dam         | Female offspring | Dam         | Male offspring   | Dam         | Female offspring | Dam         | Male offspring   | Dam         | Female offspring |
| D1          | 2                | D1          | 1                | D1          | 2                | D1          | 2                | D1          | 1                | D1          | 1                | D1          | 4                | D1          | 2                |
| D2          | 1                | D2          | 1                | D2          | 2                | D2          | 1                | D2          | 1                | D2          | 3                | D2          | 3                | D2          | 3                |
| D3          | 1                | D3          | 2                | D3          | 2                | D3          | 1                | D3          | 1                | D3          | 3                | D3          | 1                |             |                  |
| D4          | 1                | D4          | 1                | D4          | 2                | D4          | 1                | D4          | 4                | D4          | 1                |             |                  |             |                  |
| D5          | 2                | D5          | 1                |             |                  | D5          | 2                | D5          | 1                |             |                  |             |                  |             |                  |
|             |                  | D6          | 2                |             |                  |             |                  |             |                  |             |                  |             |                  |             |                  |
| <b>Dams</b> | <b>Offspring</b> | <b>Dams</b> | <b>Offspring</b> | <b>Dams</b> | <b>Offspring</b> | <b>Dams</b> | <b>Offspring</b> | <b>Dams</b> | <b>Offspring</b> | <b>Dams</b> | <b>Offspring</b> | <b>Dams</b> | <b>Offspring</b> | <b>Dams</b> | <b>Offspring</b> |
| <b>5</b>    | <b>7</b>         | <b>6</b>    | <b>8</b>         | <b>4</b>    | <b>8</b>         | <b>5</b>    | <b>7</b>         | <b>5</b>    | <b>8</b>         | <b>4</b>    | <b>8</b>         | <b>3</b>    | <b>8</b>         | <b>2</b>    | <b>5</b>         |

This Table describes the distribution of offspring obtained from different surrogate dams and how they were included in experiments related to vascular structure and function, and those related to the measurement of diabetes biomarkers using the Bio-Plex system.
